# Supplementary material
Source: PubMed Central journal article supplement (PMC4581908)
Supplement: NIHMS696889-supplement-01.pdf [file NIHMS696889-supplement-01.pdf]

## **Supplemental Figure Legends**

**Supplemental Digital Content 1 . Table shows** Primer sequences for qRT-PCR analysis.

**Supplemental Digital Content 2. Figure shows** GO term analysis for upregulated and downregulated loci. A) The 30 most highly associated GO terms with upregulated transcripts. Longer bars correspond to greater number of loci associated with specific GO term. B) The 30 most highly associated GO terms with downregulated transcripts. Longer bars correspond to greater number of loci associated with specific GO term.

**Supplemental Digital Content 3. Figure shows** Guilt-by-association GO term analysis for lncRNA. Number of associated coding genes assigned to each lncRNA corresponding to more GO terms assigned to each specific lncRNA.

---

| <b>Gene</b>      | <b>Forward Primer Sequence</b> | <b>Reverse Primer Sequence</b> |
|------------------|--------------------------------|--------------------------------|
| <i>HSD17B7P2</i> | GAACTGGAGCCTCTCCTCTG           | TTAGATTTCTTGCATTGCG            |
| <i>AQP7P1</i>    | CCACTGAGAGTAGGGCACAA           | CAAGTCCCATAGGCAACTCA           |
| <i>AQP7P3</i>    | GGCACAGGCGAACATACATA           | CGTGGTTCCAAGTTAGCATC           |

---

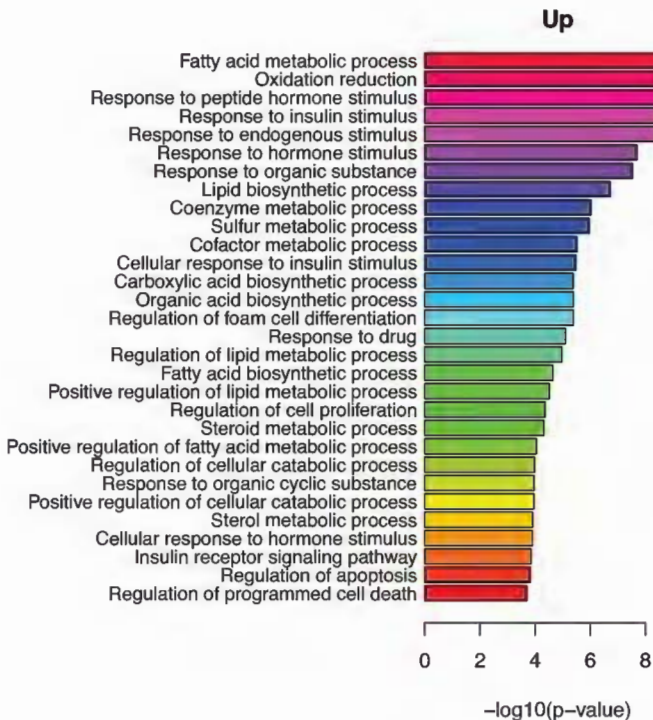

(a)

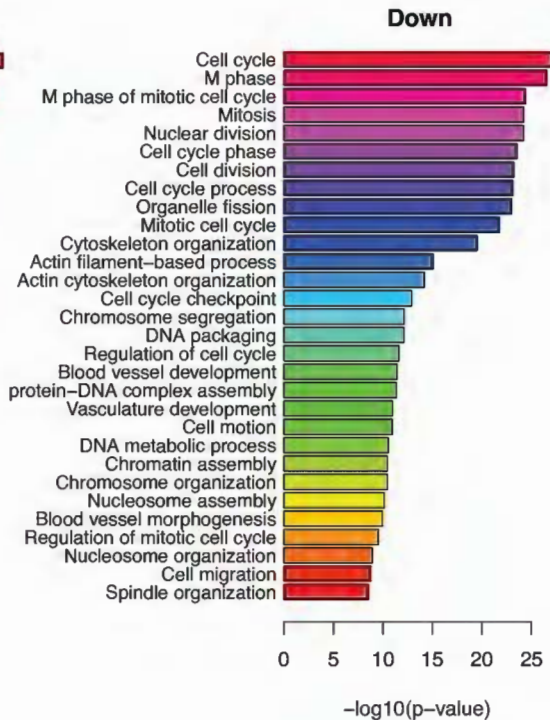

(b)
